# Supplementary material
Source: PubMed Central journal article supplement (PMC9513708)
Supplement: jamaneurol-e223018-s002.pdf [file jamaneurol-e223018-s002.pdf]

## Supplemental Online Content

Liang F, Wu Y, Wang X, et al; the CANVAS II Group. General anesthesia vs conscious sedation for endovascular treatment of patients with posterior circulation acute ischemic stroke: an exploratory randomized clinical trial. *JAMA Neurol*. Published online September 26, 2022.  
doi:10.1001/jamaneurol.2022.3018

**eTable 1.** Characteristics Supplement

**eTable 2.** Univariate, multivariate regression and modified Poisson regression of important outcomes

**eTable 3.** Perioperative change of systolic blood pressure

This supplemental material has been provided by the authors to give readers additional information about their work.

**eTable1. Characteristics Supplement**

| Characteristics       | No. (%) of patients |          |       |
|-----------------------|---------------------|----------|-------|
|                       | GA(n=43)            | CS(n=44) | P     |
| Thrombectomy approach |                     |          | 0.362 |
| ACT alone             | 1(2.3)              | 0(0)     |       |
| MT alone              | 36(83.7)            | 24(77.4) |       |
| ST alone              | 2(4.7)              | 1(3.2)   |       |
| ACT and MT            | 1(2.3)              | 0(0)     |       |
| MT and ST             | 3(7)                | 5(16.1)  |       |
| AT, MT and ST         | 0(0)                | 1(3.2)   |       |

a. ACT: Arterial catheter thrombolysis; MT: Mechanical thrombectomy; ST: Stent implantation

b. This table is based on the intention-to-treat analysis.

**eTable 2 Univariate, multivariate regression and modified Poisson regression of important outcomes**

|                                     | Intention-to-treat analysis |                                   |                          | Per-protocol analysis  |                      |                 |
|-------------------------------------|-----------------------------|-----------------------------------|--------------------------|------------------------|----------------------|-----------------|
|                                     | Unadjusted OR (95% CI)      | Adjusted OR <sup>a</sup> (95% CI) | RR <sup>b</sup> (95% CI) | Unadjusted OR (95% CI) | Adjusted OR (95% CI) | RR (95% CI)     |
| Favourable outcome (mRS 0-2)        | 0.75(0.34-1.85)             | 0.91(0.37-2.22)                   | 0.89(0.58-1.38)          | 0.60(0.24-1.54)        | 0.64(0.23-1.80)      | 0.93(0.80-1.10) |
| Excellent outcome (mRS 0-1)         | 0.48(0.19-1.22)             | 0.58(0.22-1.53)                   | 0.94(0.84-1.05)          | 0.37(0.14-1.00)        | 0.43(0.15-1.27)      | 0.90(0.79-1.03) |
| Successful reperfusion (mTICI 2b-3) | 6.03(1.24-29.40)            | 5.86(1.16-29.53)                  | 1.17(1.04-1.31)          | 5.98(1.15-31.14)       | 5.12(0.94-27.84)     | 1.15(1.02-1.31) |
| Mortality                           |                             |                                   |                          |                        |                      |                 |
| At discharge                        | 1.32(0.33-5.27)             | 1.36(0.33-5.67)                   | 1.01(0.94-1.09)          | 3.95(0.44-35.62)       | 4.63(0.49-43.61)     | 1.05(0.98-1.12) |
| At 30d                              | 1.03(0.36-2.93)             | 1.05(0.35-3.14)                   | 1.00(0.91-1.11)          | 1.35(0.40-4.55)        | 1.56(0.42-5.80)      | 1.03(0.93-1.15) |
| At 90d                              | 1.18(0.43-3.26)             | 1.18(0.14-3.41)                   | 1.01(0.92-1.12)          | 1.35(0.40-4.55)        | 1.81(0.51-6.44)      | 1.05(0.95-1.16) |

a. The adjusted odds ratio was estimated using a multivariate logistic regression model by taking the following variables into account: age, baseline NIHSS score, occlusion site, and the use of IV-tPA.

b. RR (risk ration) is from modified Poisson regression by taking the following variables into account: age, baseline NIHSS score, occlusion site, and the use of IV-tPA.

**eTable 3. Perioperative change of systolic blood pressure**

| Characteristic     | GA(n=43) | CS(n=44) | P      |
|--------------------|----------|----------|--------|
| SBP,mean(SD), mmHg |          |          |        |
| T1                 | 161(19)  | 161(22)  | .947   |
| T2                 | 158(22)  | 159(19)  | .803   |
| T3                 | 155(22)  | 168(20)  | .534   |
| T4                 | 145(27)  | 157(23)  | .029   |
| T5                 | 132(24)  | 152(21)  | <0.001 |
| T6                 | 124(19)  | 146(21)  | <0.001 |
| T7                 | 134(57)  | 146(25)  | .197   |
| T8                 | 126(15)  | 146(21)  | <0.001 |
| T9                 | 130(16)  | 141(16)  | .027   |
| T10                | 135(12)  | 142(27)  | .575   |
| T11                | 129(15)  | 146(23)  | <0.001 |
| T12                | 127(22)  | 140(20)  | .003   |

a. T1: in-door; T2: 10 min before sedation or induction; T3: sedation or induction; T4: groin puncture; T5: 10min after sedation or induction, T6: 20min after sedation or induction, T7: 30min after sedation or induction; T8: 1h after sedation or induction, T9: 2h after sedation or induction, T10: reperfusion, T11: therapy finished, T12: out-off the room.

b. Data missing of T8 and T9 are due to short operation time. 41 and 43 patients were included at T8 time points in GA group and CS group, respectively. This number is 26 and 20 at T9 time points in the two groups. This number is 7 at T9 time points in the two groups.
