# Supplementary material
Source: PubMed Central journal article supplement (PMC9513708)
Supplement: jamaneurol-e223018-s003.pdf [file jamaneurol-e223018-s003.pdf]

\*First name, last name, and suffix (if applicable) are required and will appear in PubMed.

| <b>*Group Name(s): CANVAS II Group</b>   |                   |                              |                  |                                                      |                                          |                                                         |                                                                                            |
|------------------------------------------|-------------------|------------------------------|------------------|------------------------------------------------------|------------------------------------------|---------------------------------------------------------|--------------------------------------------------------------------------------------------|
| <b>*First Name and Middle Initial(s)</b> | <b>*Last Name</b> | <b>*Suffix (eg, Jr, III)</b> | Academic Degrees | Institution                                          | Location (city, state/province, country) | Role or Contribution, eg, chair, principal investigator | Group (if more than 1 Group listed in the byline) and/or Subgroup (eg, Steering Committee) |
| Matthew TV                               | Chan              |                              |                  | Chinese University of Hong Kong                      | Hong Kong, China                         |                                                         | Trial Steering Committee                                                                   |
| Zhongrong                                | Miao              |                              |                  | Beijing Tiantan hospital, Capital Medical University | Beijing, China                           |                                                         | Trial Steering Committee                                                                   |
| Xiaochuan                                | Huo               |                              |                  | Beijing Tiantan hospital, Capital Medical University | Beijing, China                           |                                                         | Trial Management Group (TMG)                                                               |
| Yuming                                   | Peng              |                              |                  | Beijing Tiantan hospital, Capital Medical University | Beijing, China                           |                                                         |                                                                                            |
| Guoming                                  | Li                |                              |                  | Beijing Tiantan hospital, Capital Medical University | Beijing, China                           |                                                         |                                                                                            |
| Yang                                     | Zhou              |                              |                  | Beijing Tiantan hospital, Capital Medical University | Beijing, China                           |                                                         |                                                                                            |
| Yang                                     | Bai               |                              |                  | Beijing Tiantan hospital, Capital Medical University | Beijing, China                           |                                                         |                                                                                            |
| Xiuheng                                  | Li                |                              |                  | Beijing Tiantan hospital, Capital Medical University | Beijing, China                           |                                                         |                                                                                            |
| Xiang                                    | Yan               |                              |                  | Beijing Tiantan hospital, Capital Medical University | Beijing, China                           |                                                         |                                                                                            |
| Wanning                                  | Yang              |                              |                  | Beijing Tiantan hospital, Capital Medical University | Beijing, China                           |                                                         |                                                                                            |
| Xinxin                                   | Wang              |                              |                  | Beijing Tiantan hospital, Capital Medical University | Beijing, China                           |                                                         |                                                                                            |
| Jiaxin                                   | Li                |                              |                  | Beijing Tiantan hospital, Capital Medical University | Beijing, China                           |                                                         |                                                                                            |
| Yan                                      | Zhao              |                              |                  | Beijing Tiantan hospital, Capital Medical University | Beijing, China                           |                                                         |                                                                                            |
| Shu                                      | Li                |                              |                  | Beijing Tiantan hospital, Capital Medical University | Beijing, China                           |                                                         |                                                                                            |

## Supplemental Online Content: Nonauthor Collaborators

\*First name, last name, and suffix (if applicable) are required and will appear in PubMed.

| <b>*First Name and Middle Initial(s)</b> | <b>*Last Name</b> | <b>*Suffix (eg, Jr, III)</b> | Academic Degrees | Institution                                          | Location (city, state/province, country) | Role or Contribution, eg, chair, principal investigator | Group (if more than 1 Group listed in the byline) and/or Subgroup (eg, Steering Committee) |
|------------------------------------------|-------------------|------------------------------|------------------|------------------------------------------------------|------------------------------------------|---------------------------------------------------------|--------------------------------------------------------------------------------------------|
| Yiming                                   | Deng              |                              |                  | Beijing Tiantan hospital, Capital Medical University | Beijing, China                           |                                                         |                                                                                            |
| Dapeng                                   | Mo                |                              |                  | Beijing Tiantan hospital, Capital Medical University | Beijing, China                           |                                                         |                                                                                            |
| Ligang                                   | Song              |                              |                  | Beijing Tiantan hospital, Capital Medical University | Beijing, China                           |                                                         |                                                                                            |
| Xuan                                     | Sun               |                              |                  | Beijing Tiantan hospital, Capital Medical University | Beijing, China                           |                                                         |                                                                                            |
