# Supplementary material
Source: PubMed Central journal article supplement (PMC9513708)
Supplement: jamaneurol-e223018-s004.pdf [file jamaneurol-e223018-s004.pdf]

## Data Sharing Statement

Liang. General Anesthesia vs Conscious Sedation for Endovascular Treatment of Patients With Posterior Circulation Acute Ischemic Stroke. *JAMA Neurol.* Published September 26, 2022. doi:10.1001/jamaneurol.2022.3018

### Data

**Data available:** Yes

**Data types:** Deidentified participant data

**How to access data:** [ruquan.han@ccmu.edu.cn](mailto:ruquan.han@ccmu.edu.cn)

**When available:** With publication

### Supporting Documents

**Document types:** None

### Additional Information

**Who can access the data:** [ruquan.han@ccmu.edu.cn](mailto:ruquan.han@ccmu.edu.cn)

**Types of analyses:** for a specified purpose

**Mechanisms of data availability:** after approval of a proposal
